# Supplementary material for: Importance of active layer freeze-thaw cycles on the riverine dissolved carbon export on the Qinghai-Tibet Plateau permafrost region
Source: PeerJ. 2019 Jun 17;7:e7146. doi: 10.7717/peerj.7146 (PMC6585901; doi:10.7717/peerj.7146)
Supplement: Supplemental Information 1 — Abbreviations and units: DICC, dissolved inorganic carbon concentration in mg/l; DOCC, dissolved organic carbon in mg L−1; TDN, total dissolved nitrogen concentration in mg L−1; precipitation, mm; runoff, discharge in mm/day; soil and air temperature, °C. [file peerj-07-7146-s001.xlsx]

## Sheet: Entire watershed (catchment 1)
Date	Runoff	Precipitation	Air Temperature	Soil Temperature	Soil Miosture	DICC	DOCC	DOC/TDN
2014-05-01	0.0463922	0	-4.06944	-0.783686	0.122462	9.535	3.889	2.69135
2014-05-04	0.0514917	0	-4.07785	-0.408329	0.129506	10.8917	3.98033	2.27145
2014-05-10	0.166239	0	-6.5386	-0.175642	0.138888	12.9173	3.98767	2.07152
2014-05-16	0.0881899	2.5	-3.40556	0.123081	0.153229	8.14833	2.32667	1.44633
2014-05-19	0.0924817	2.7	1.01773	0.628878	0.154765	11.4333	3.389	1.59258
2014-06-04	0.136452	0.1	4.93637	2.66104	0.190791	15.3253	3.60133	1.28268
2014-06-07	0.267293	0	3.96827	3.06262	0.191495	12.0873	3.26833	1.34186
2014-06-10	0.205372	4.6	1.91292	2.35221	0.193153	11.21	2.647	1.15707
2014-06-11	0.470554	1.7	-0.753	1.88904	0.194476	10.7697	2.75467	0.749637
2014-06-12	0.193131	0.3	-1.88029	1.07787	0.194472	9.325	3.47833	0.967996
2014-06-13	0.294671	0.2	-1.5234	0.922231	0.201798	8.39067	3.693	1.17487
2014-06-15	0.749598	0.1	-0.177833	1.77202	0.211376	8.061	3.64533	1.69787
2014-06-18	0.934867	3.5	1.61683	2.4497	0.210162	8.68267	2.87267	1.71366
2014-06-21	0.449284	2.8	3.06002	2.9881	0.211877	7.84267	2.518	1.48847
2014-06-25	0.593445	3.7	3.31875	3.31236	0.221901	10.6423	3.38067	2.82193
2014-07-05	0.154715	0.4	6.68192	4.42266	0.221718	23.8007	4.64267	2.2788
2014-07-06	0.887427	8.6	5.86379	4.5011	0.229123	13.648	4.24167	2.76751
2014-07-11	0.513172	0.4	5.82275	4.97404	0.23431	18.312	3.914	2.4606
2014-07-16	0.0759107	0	7.5455	5.19182	0.223513	21.9323	4.18633	1.68849
2014-07-18	0.226762	2.2	7.27827	5.48424	0.229186	17.2363	5.77067	3.22384
2014-07-23	1.40639	0	3.09285	4.39855	0.248951	18.5113	3.64933	2.3972
2014-07-27	0.404913	0.6	5.48752	4.98049	0.238247	14.1253	3.203	1.60471
2014-07-30	0.440512	0	6.56196	4.94658	0.236841	20.4333	3.85	1.82724
2014-08-02	1.15197	9.9	6.70212	5.57795	0.24124	16.895	3.19633	2.28636
2014-08-05	3.74275	11.4	6.19287	5.83082	0.260335	20.7827	3.99833	3.71362
2014-08-08	1.19094	0.7	5.51421	5.1352	0.257324	15.3073	3.70967	2.85872
2014-08-21	1.32472	0	1.08608	4.50559	0.251784	27.3347	4.93033	3.40571
2014-08-26	0.745855	0.5	2.3046	3.67914	0.235648	25.365	4.63667	2.59806
2014-09-01	0.664559	2.2	2.1126	3.65541	0.24318	24.579	4.915	2.98301
2014-09-05	1.53048	5.4	6.10115	4.76223	0.246579	30.901	6.378	2.49726
2014-09-10	4.77713	2.4	3.98221	5.05095	0.261025	26.4973	5.67333	2.53803
2014-09-15	2.80698	2.3	1.55506	2.92043	0.253248	22.1323	3.88533	4.20339
2014-09-20	1.06289	0.4	2.88223	3.22316	0.238668	23.6523	4.64667	2.10098
2014-09-25	1.09451	0	-0.594417	1.79537	0.236104	24.0143	5.02667	2.26189
2014-09-30	1.38606	5	-6.13338	1.07857	0.229552	22.1507	4.41067	2.47837
2014-10-05	1.05943	0.1	-1.9246	0.569793	0.213672	26.912	4.73767	2.2939
2014-10-10	0.59961	0	1.29579	0.731326	0.219193	23.5543	4.62167	2.2468
2014-10-15	0.189719	3.1	-0.147229	0.491024	0.210781	24.029	4.70233	2.24205
2014-10-21	0.286651	0	-5.1964	-0.294381	0.183573	25.9403	4.849	2.27297
2014-10-26	0.260437	0	-3.1666	-0.304003	0.172549	26.6603	4.73333	2.27966
2016-05-22	0.110467	0	-1.21452	0.183832	0.171071	25.526	6.118	6.49469
2016-05-23	0.133313	0	0.790188	0.269044	0.169421	23.78	8.125	5.98306
2016-05-24	0.124642	0	2.65204	0.494613	0.168138	22.657	5.614	4.04758
2016-05-25	0.278475	0.5	-2.68115	0.158146	0.166814	24.44	5.571	4.53295
2016-05-26	0.25992	1.1	-1.65942	0.314333	0.170285	21.583	5.865	4.74515
2016-05-27	0.396899	3.4	-2.84602	0.116694	0.172448	22.286	5.714	4.40555
2016-05-28	0.696774	0	-0.972562	0.247444	0.177562	24.9	7.638	6.98811
2016-05-29	0.798018	0	0.707792	0.560535	0.181663	26.527	8.043	8.69514
2016-05-30	0.848209	4.4	0.472896	0.229772	0.182426	24.218	8.072	11.0727
2016-05-31	0.982691	0	-1.00267	0.0853711	0.186445	26.074	8.391	11.0118
2016-06-01	0.737966	0.3	-1.75581	0.0730659	0.186148	26.221	7.232	9.27179
2016-06-02	0.428631	0	-0.840812	0.105419	0.186878	27.814	8.647	11.4378
2016-06-03	0.556245	0	1.93527	0.397321	0.188885	27.34	8.046	8.14372
2016-06-04	0.558126	0	2.75079	1.23088	0.190635	24.963	6.963	7.36047
2016-06-05	0.418077	1.4	2.59392	0.993781	0.18355	26.106	6.943	9.7514
2016-06-06	1.32389	5.5	1.08956	1.00949	0.189748	25.825	7.069	11.9007
2016-06-07	0.870338	0.6	3.87727	1.27589	0.189716	25.151	6.927	9.82553
2016-06-08	0.646899	1.8	0.710917	0.57618	0.193857	25.679	7.862	9.97716
2016-06-09	0.923873	0	1.80777	0.999938	0.21162	28.785	7.163	1.98807
2016-06-10	0.735685	0	3.05423	1.39798	0.208014	25.228	5.699	10.6127
2016-06-11	0.607359	0	3.43792	1.75396	0.211602	27.644	6.289	9.60153
2016-06-12	0.459172	0	5.33448	1.91666	0.223922	24.91	4.989	7.36928
2016-06-13	0.400542	0	6.15652	2.17749	0.226096	27.123	8.779	16.1379
2016-09-01	1.12001	9.2	5.47312	5.94712	0.258128	29.766	7.54	7.90356
2016-09-02	2.06378	6.6	4.09554	5.69097	0.266911	32.081	7.232	7.37207
2016-09-03	1.85047	5.8	3.49677	5.48794	0.267429	34.48	10.539	9.61588
2016-09-04	1.75375	1.8	3.4976	5.17398	0.267118	36.375	9.819	6.65695
2016-09-05	1.51316	0.2	2.09765	5.4293	0.266572	31.814	8.612	8.66398
2016-09-06	1.96647	0.1	2.92854	4.76069	0.258147	40.942	8.425	4.281
2016-09-07	1.79652	1.1	2.26629	4.78931	0.254861	35.57	8.021	3.79064
2016-09-08	1.5677	0.9	3.19323	4.71188	0.254636	31.969	7.865	4.74367
2016-09-09	1.51989	0.2	1.83927	4.39292	0.250789	32.805	7.006	3.76869
2016-09-10	1.39889	0	2.29081	4.23715	0.24847	34.333	7.649	4.5693
2016-09-11	1.43796	0.5	2.88373	4.28015	0.24531	33.811	7.583	4.2673
2016-09-12	1.26149	0.5	1.71525	4.07572	0.243515	29.474	7.255	3.59514
2016-09-13	2.14032	11.3	1.81921	3.75597	0.24526	32.809	9.92	6.12724
2016-09-14	1.62277	1.4	1.8601	3.87209	0.250474	35.853	9.37	6.86447
2016-09-15	1.34804	2.2	2.14065	3.86326	0.247669	33.659	9.095	5.11818
2016-09-16	1.88032	2.9	2.60369	4.23554	0.25134	35.314	10.139	6.31713
2016-09-17	2.49247	5.3	0.490896	3.96616	0.253232	38.287	12.633	11.6648
2016-09-18	1.76784	0.6	-0.323375	3.3067	0.254767	41.201	8.989	6.39786
2016-09-19	1.82303	0.2	-0.422208	3.01994	0.25327	42.863	11.117	4.55989
2016-09-20	1.55826	0	-0.656021	2.91851	0.247785	37.823	8.662	2.99309
2016-09-21	1.28178	0	1.90644	3.03815	0.24449	35.162	8.71	3.89187
2016-09-22	1.21786	0.2	-0.703208	3.24911	0.244081	34.182	6.503	2.55923
2016-09-23	1.03703	0	-2.29554	2.4658	0.240488	30.607	7.282	2.65961
2016-09-24	1.31092	0	-0.809958	1.83526	0.241671	39.726	7.747	3.00621
2016-09-26	1.46943	0.4	-1.74962	1.06767	0.236671	42.856	13.786	13.0426
2016-09-27	1.34078	0.1	-1.1011	0.923957	0.236033	30.848	7.493	3.50304
2016-09-28	1.1259	0	-1.72725	0.978483	0.237061	29.785	5.58	1.23152
2016-09-29	1.34865	2.7	-3.1609	1.24218	0.240061	29.572	6.536	1.40892
2016-09-30	0.884442	0.1	1.25715	1.60026	0.240848	35.15	9.073	3.58051
2016-10-01	0.970198	0	1.14015	1.45973	0.236835	38.042	8.199	2.56861
2016-10-02	0.757342	0	3.20637	1.56288	0.235282	35.304	8.3	2.81451
2016-10-03	0.753422	0.1	2.06406	1.46662	0.232522	34.531	7.377	3.78891
2016-10-05	0.61439	0	0.0532292	1.49186	0.22908	36.831	7.109	2.30962
2016-10-06	0.565654	0	-0.852917	1.52842	0.227837	32.926	7.09	2.52223
2016-10-07	0.581353	0	-0.910146	1.68566	0.227364	31.302	6.492	2.26045
2016-10-08	0.642656	0.6	-0.618625	1.73755	0.227119	35.815	6.85	2.10769
2016-10-09	0.699116	0	-2.07442	1.46766	0.225792	40.102	8.147	3.0275
2016-10-10	0.830351	0.3	-1.5214	1.33143	0.225708	34.052	7.275	2.19457
2016-10-11	0.717615	0.3	-3.68213	1.18808	0.225316	38.14	8.035	2.6846
2016-10-12	1.05161	1.6	-4.2774	1.20033	0.225824	35.026	7.3	2.51204
2016-10-13	1.06281	0	-3.73462	0.947134	0.224844	35.169	7.986	3.56359
2016-10-14	0.797432	0	-3.31527	0.695735	0.22343	39.714	8.144	2.48368
2016-10-15	0.880676	0	-2.76456	0.571775	0.219678	30.46	6.053	2.36723
2016-10-16	0.649329	0	-5.33958	0.512875	0.219689	39.502	7.614	2.52957
2016-10-17	0.745172	0	-4.75835	0.466699	0.212589	34.685	8.145	4.36261
2016-10-19	0.661528	0	-3.1126	0.235244	0.204885	42.742	8.739	4.32624
2016-10-20	0.701751	0	-1.75823	0.202277	0.203808	41.909	7.386	3.4725
2016-10-21	0.552482	0	-2.72921	0.0217886	0.199874	36.837	8.628	3.52595
2016-10-22	0.615546	0	-4.77233	-0.125316	0.197099	44.036	8.256	2.62428
2016-10-23	0.631095	0	-3.44098	-0.165929	0.193574	37.1	8.017	2.64675
2016-10-24	0.592212	0	-5.22438	-0.413244	0.185316	38.929	8.286	2.37625
2016-10-25	0.490254	0	-5.17229	-0.355305	0.18143	46.626	8.835	2.82449
2016-10-26	0.329019	0	-5.08679	-0.391715	0.178348	47.497	8.07	2.55541
2016-10-27	0.289851	0	-7.86888	-0.438677	0.176629	42.838	8.463	3.07634

## Sheet: Metadata
Precipitation	mm
Air Temperature	°C
DIC	mg/l
DOC	mg/l
Runoff	mm/d
Soil Temperature	°C
Soil Miosture	Constant between 0 to 1
